# Supplementary material for: Multiple measures for self-identification improve matching donors with patients in unrelated hematopoietic stem cell transplant
Source: PubMed Central journal article supplement (PMC11449941; doi:10.1038/s43856-024-00620-w), 2024-10-03
Supplement: 43856_2024_620_MOESM2_ESM.pdf [file 43856_2024_620_MOESM2_ESM.pdf]

## Description of Additional Supplementary Files

**File name:** Supplementary Data Table 1

**File description:** Processed data underlying all figures and tables.
